# Supplementary material for: Morphological transformation of ultrasonically obtained nanofibers during living self-assembly
Source: Royal Society of Chemistry journal article supplement (doi:10.1039/d0nj01665a), 2020-01-01
Supplement: d0nj01665a1.pdf [file d0nj01665a1.pdf]

Supporting Information

**Morphologic transformation of ultrasonically obtained nanofibers  
during living self-assembly**

Liangkai Zhang<sup>a</sup>, Yanjun Gong<sup>a</sup>, Tao Wang<sup>b</sup>, Jianhong Xiao<sup>b</sup>,

Yiping Pang<sup>c</sup>, Qiongzhen Hu<sup>d</sup> and Li Yu<sup>a\*</sup>

<sup>a</sup>*Key Laboratory of Colloid and Interface Chemistry, Shandong University, Ministry of Education,  
Jinan 250100, P.R. China.*

<sup>b</sup>*Petroleum Engineering Technology Research Institute of Shengli Oilfield, Sinopec,  
Dongying 257000, P. R. China.*

<sup>c</sup>*College of Chemistry and Chemical Engineering, University of Jinan,  
Jinan 250022, P. R. China.*

<sup>d</sup>*Qilu University of Technology (Shandong Academy of Sciences), Shandong Analysis and Test Center,  
Jinan 250014, P. R. China.*

---

\*Corresponding author: Prof. Li Yu

Phone number: +86-531-88364807

Fax number: +86-531-88564750

Email address: ylm1t@sdu.edu.cn

## 1. Synthesis of COOH-Functionalized Imidazolium SAILs

N-alkyl-N'-carboxymethyl imidazolium bromides ([N-C<sub>n</sub>, N'-COOH-Im]Br, *n*=6, 12) were prepared according to the previous literature [1]. The <sup>1</sup>H NMR spectra were recorded by a Bruker AV-400 NMR spectrometer with a pulse field gradient module (Z-axis).

**1.1** <sup>1</sup>H NMR (400 MHz, D<sub>2</sub>O) of [N-C<sub>6</sub>, N'-COOH-Im]Br: δ=8.92 (dd, *J* = 53.4, 38.7 Hz, 1H), 7.69 - 7.35 (m, 2H), 4.70 (s, 2H), 4.26 - 4.18 (m, 2H), 1.86 (d, *J* = 4.2 Hz, 2H), 1.26 - 1.13 (m, 6H), 0.79 (t, *J* = 7.0 Hz, 3H).

**1.2** <sup>1</sup>H NMR (400 MHz, D<sub>2</sub>O) of [N-C<sub>12</sub>, N'-COOH-Im]Br: δ=8.67 (s, 1H), 7.48 - 7.29 (m, 2H), 4.77 (t, *J* = 28.2 Hz, 2H), 4.12 (t, *J* = 7.1 Hz, 2H), 1.87 - 1.69 (m, 2H), 1.27 - 0.98 (m, 18H), 0.76 (t, *J* = 6.8 Hz, 3H).

## 2. Synthesis of 1-dodecyl-3-methylimidazolium bromide

1-Methylimidazole and excess 1-bromododecane were added into the circular bottom flask and dichloromethane was added as the solvent. The mixture was heated to 75-80 °C for 48 h under stirring and nitrogen protection. After the reaction, the reactants were cooled and the excess dichloromethane was removed with a rotary evaporator. The product was recrystallized at least three times by ethyl acetate, and finally the white powder solid was obtained. The solid was dried in a vacuum drying oven at 55 °C for 48 h to obtain the final product 1-dodecyl-3-methylimidazolium bromide. <sup>1</sup>H NMR (400 MHz, D<sub>2</sub>O) of [N-C<sub>12</sub>, N'-CH<sub>3</sub>-Im]Br: δ 7.45 (dd, *J* = 7.4, 1.9 Hz, 2H), 4.16 (t, *J* = 7.3 Hz, 2H), 3.83 (s, 3H), 1.85 - 1.70 (m, 2H), 1.17 (d, *J* = 39.6 Hz, 18H), 0.72 (t, *J* = 6.7 Hz, 3H).

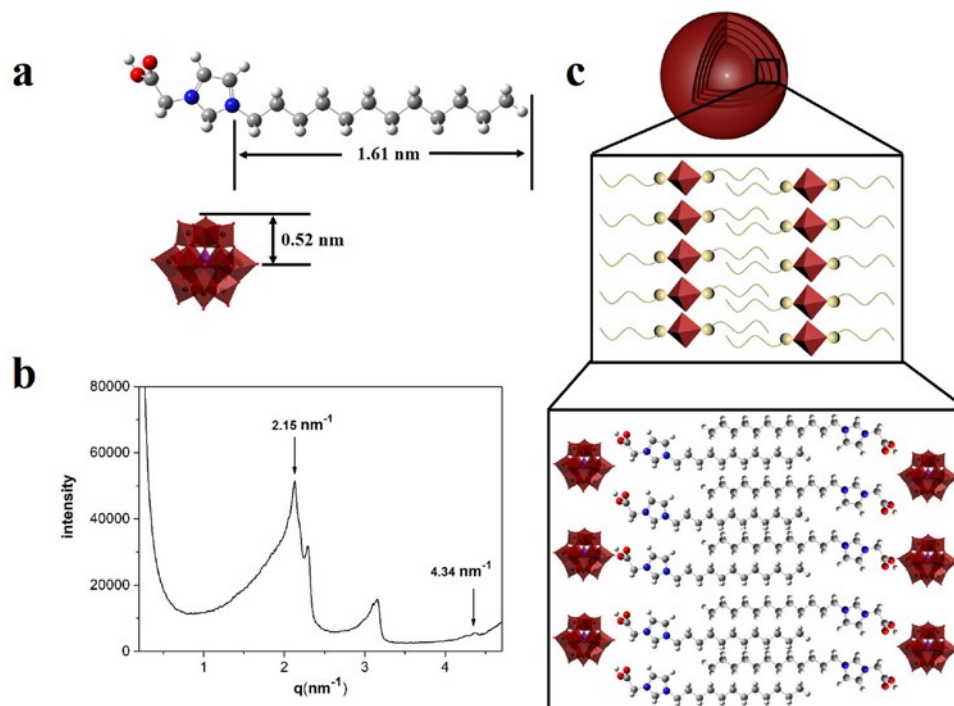

Fig. S1 (a) Geometry of [N-C<sub>12</sub>, N'-COOH-Im]Br optimized at the B3LYP/6-31G(d,p) level and schematic view of POM. (b) The small angle X-ray scattering (SAXS) diffractogram of the POM/[N-C<sub>12</sub>, N'-COOH-Im]Br hybrid materials. (c) Schematic illustration of the structure of POM/[N-C<sub>12</sub>, N'-COOH-Im]Br hybrid materials.

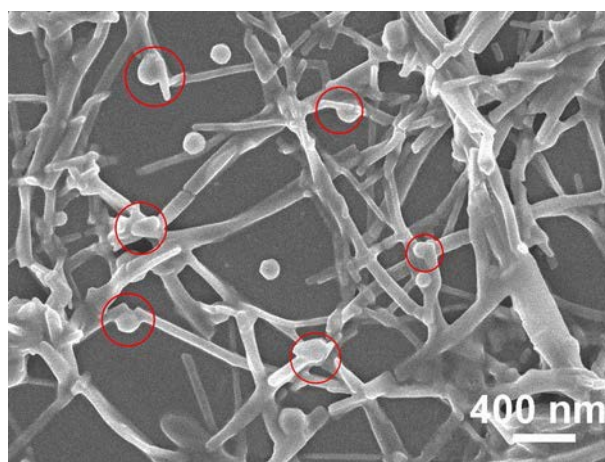

Fig. S2 SEM image of the elongation process for POM/[N-C<sub>12</sub>, N'-COOH-Im]Br hybrid materials.

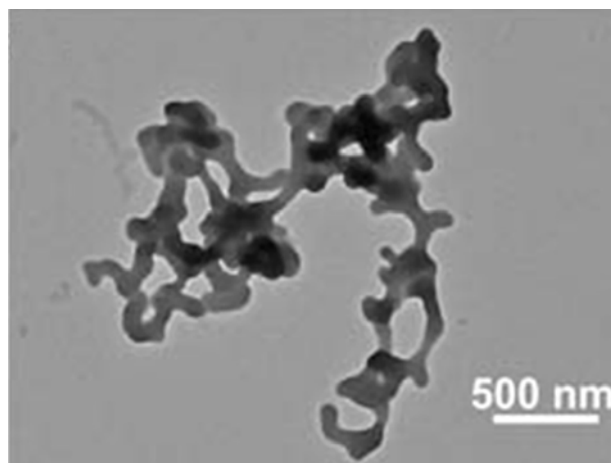

Fig. S3 TEM image of POM/[N-C<sub>12</sub>, N'-CH<sub>3</sub>-Im]Br hybrid materials.

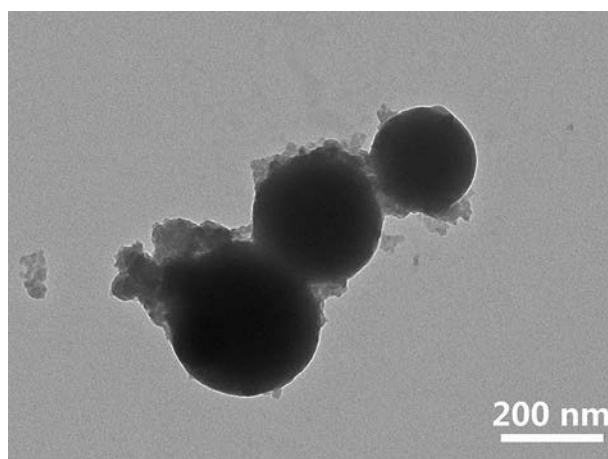

Fig. S4 TEM image of POM/[N-C<sub>6</sub>, N'-COOH-Im]Br hybrid materials after 7 days.

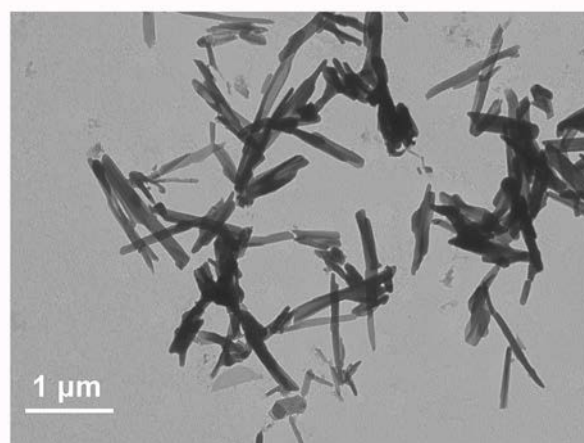

Fig. S5 TEM image of seeds for living self-assembly.

## References

1. Y. Gong, Y. Guo, Q. Hu, C. Wang, L. Zang, L. Yu, pH-Responsive Polyoxometalate-Based Supramolecular Hybrid Nanomaterials and Application as Renewable Catalyst for Dyes, ACS. Sustain. Chem. Eng. 2017, 5, 3650-3658.
